# Supplementary material for: Proteomic characterization of secretory granules in dopaminergic neurons indicates chromogranin/secretogranin-mediated protein processing impairment in Parkinson’s disease
Source: Aging (Albany NY). 2021 Aug 21;13(16):20335–58. doi: 10.18632/aging.203415 (PMC8436928; doi:10.18632/aging.203415)
Supplement: Supplementary Table 1 [file aging-13-203415-s002.xlsx]

## Sheet: primers
	Gene Name	Protein Name	Primer	Seqence
1	APOOL	MICOS complex subunit MIC27	hAPOOL-F	GGGAAAACTGACAACCATGC
			hAPOOL-R	CATATTTAGACTGGAGCGGTGG
2	CLEC3B	Tetranectin	hCLEC3B-F	GCCCTACATCTGCCAGTTC
			hCLEC3B-R	AAAGAGGCTCCAAGCGC
3	FLG2	Filaggrin-2	hFLG2-F	CATCAGTAATTCTCACCTTTCATGG
			hFLG2-R	GTGTCTTCCTGTTCTTTTAGTTGC
4	THBS1	Thrombospondin-1	hTHBS1-F	TGCCAGTACGTCTACAATGTG
			hTHBSQ-R	GTATCTCCAATGCGGTCTGAG
5	COTL1	Coactosin-like protein	hCOTL1-F	CTTTTAAATATGACGGCTCCACC
			hCOTL1-R	ACTTGGACCTCTTGCTCATG
6	CYB5R1	NADH-cytochrome b5 reductase 1	hCYB5R1-F	AGGCTATGTGGATCTTGTCATC
			hCYB5R1-R	AGTGTAAGTGAGCAACCCG
7	CALM3	CALM3	hCALM3-F	TTGACAAGGATGGAGATGGC
			hCALM3-R	CTCCGGGAAGTCAATGGTC
8	APOH	Beta-2-glycoprotein 1	hAPOH-F	GCCCATCAACACTCTGAAATG
			hAPOH-R	CGCCATTCAGATAAAACCCAG
9	CPPED1	Serine/threonine-protein phosphatase CPPED1	hCPPED1-F	AGACAAGTTCATCCACGCAG
			hCPPED1-R	CATGTCGAGGTTCTGGTAGG
10	ANXA11	Annexin;Annexin A11	hANAXA11-F	TCCGAGAATTAAACAGAGCCTAC
			hANAXA11-R	CATGTCCACGTTTGTGCTTTC
11	CD9	Tetraspanin;CD9 antigen	hCD9-F	GATTGCTGTCCTTGCCATTG
			hCD9-R	GGCTCCGATCAGAATATAGACTC
12	ANXA7	Annexin;Annexin A7	hANXA7-F	CGTTTACTTGTGTCCATGTGC
			hANXA7-R	GCAAGATTCATCGGTCCCTAG
13	ACTN4	Alpha-actinin-4	hACTN4-F	TGAATGAGATCCGCAGGC
			hACTN4-R	TTGATGTCCGATAGTGTGGC
14	RAC1	Ras-related C3 botulinum toxin substrate 1;Ras-related C3 botulinum toxin substrate 2	hRAC1-F	GCCGCTTCCTATCTCAGC
			hRAC1-R	ATGCATTGGTTGTGTAACTGATC
15	DYNLT1	Dynein light chain Tctex-type 1	hDYNLT1-F	TGAAGTGAGCAACATTGTAAAAGAG
			hDYNLT1-R	GCTTGGTGAGTTGGCTTAAAG
16	PGM2	Phosphoglucomutase-2	hPGM2-F	GGGACCTTACAACTGGCTATG
			hPGM2-R	ACTTGATTTTGGGCTCTGTCC
17	PGM1	Phosphoglucomutase-1	hPGM1-F	GATGTTTGATCGCTCCTTTGTG
			hPGM1-R	GAACCATCTGTGAAAATGAGGC
18	HEL-S-44	Superoxide dismutase [Cu-Zn]	hHEL-S-44-F	TGTGGCCGATGTGTCTATTG
			hHEL-S-44-R	GCGTTTCCTGTCTTTGTACTTTC
19	CSNK2A2	Casein kinase II subunit alpha	hCSNK2A2-F	CCTGACAGACTTTGATATCCGG
			hCSNK2A2-R	CCCCAATCTATCAGTCGCAG
20	PPT1	Palmitoyl-protein thioesterase 1	hPPT1-F	TCGCAACCACAGCATCTTC
			hPPT1-R	CCAAACCACTCCGAATCTACAG
21	ABCA3	ATP-binding cassette sub-family A member 3	hABCA3-F	CATCTCTACCATCTCCTTCAGC
			hABCA3-R	CAGAGTCATCCAGTTGTACCG
22	LAMTOR2	Ragulator complex protein LAMTOR2	hLAMTOR2-F	AAAAGCCCAGGGTTAGGAAC
			hLAMTOR2-R	TGTCCCCGTAACCAGAGTAG
23	FAF2	FAS-associated factor 2	hFAF2-F	TCCATTCCGGTTTACCTATTACAC
			hFAF2-R	GTGCCCTCCCATATTTCTCTTC
24	DDX3X	ATP-dependent RNA helicase DDX3X;ATP-dependent RNA helicase DDX3Y	hDDX3X-F	AGCAAAGGGCGCTATATTCC
			hDDX3X-R	CCTCTTGAATCACTACGAGATCC
25	MAPK1	Mitogen-activated protein kinase;Mitogen-activated protein kinase 1	hMAPK1-F	AGATCTGTGACTTTGGCCTG
			hMAPK1-R	TCAATGGACTTGGTGTAGCC
26	DBH	Dopamine beta-hydroxylase;Soluble dopamine beta-hydroxylase	hDBH-F	ACTCCAAGATGAAACCCGAC
			hDBH-R	GAACTTCCAGGCGGAGATATC
27	TOR1A	Torsin-1A	hTOR1A-F	GATGTGGCTTTGGATTTCTGG
			hTOR1A-R	TGAGGTTCCGGTCAATTAAGC
28	FTH1	Ferritin;Ferritin heavy chain;Ferritin heavy chain, N-terminally processed	hFTH1-F	CTCCTACGTTTACCTGTCCATG
			hFTH1-R	TTTCTCAGCATGTTCCCTCTC
29	FUCA2	Plasma alpha-L-fucosidase	hFUCA2-F	GTTCTGTGGTCGGATGGTG
			hFUCA2-R	ACCATGCTTACAGATGCTACC
30	AP1M1	AP-1 complex subunit mu-1	hAP1M1-F	CACCATCTCCTTCATCCCAC
			hAP1M1-R	TTGGCCTTGATCATGTACTCG
31	SEC22B	Vesicle-trafficking protein SEC22b	hSEC22B-F	GCTCCATCAACACTGAATTGC
			hSEC22B-R	TGGCGGTATTTCTTGGACAG
32	DYNLL1	Dynein light chain 1, cytoplasmic	hDYNLL1-F	ACATAGAGAAGGACATTGCGG
			hDYNLL1-R	GCCCAGGTAGAAGTAGATGAAG
33	SCG2	Secretogranin-2;Secretoneurin;Manserin	hSCG2-F	GAGGAATATGCTGTGGAGCTC
			hSCG2-R	ATTAAAGGGATAAGAGACAGGGC
34	COPB1	Coatomer subunit beta	hCOPB1-F	CCAATATGAAATGCCTGACTCC
			hCOPB1-R	ATCTGGTCCCTGGTGAATTG
35	SCG3	Secretogranin-3	hSCG3-F	TGTTAGTGCTCCCGATTCAAG
			hSCG3-R	TCAAAGGTCTTTCTGCACTTAATTC
36	CHGB	Secretogranin-1;PE-11;GAWK peptide;CCB peptide	hCHGB-F	ATGAAGGAATGGTGACTCGC
			hCHGB-R	CAGTTGTCTCTTTGTCTTTGACG
37	CPE	Carboxypeptidase E	hCPE-F	CTACCTTGAGCAGATACACCG
			hCPE-R	TCTCCAGTAATCACCATCCTTTG
38	CHGA	Chromogranin-A;Vasostatin-1;Vasostatin-2;EA-92;ES-43;Pancreastatin;SS-18;WA-8;WE-14;LF-19;Catestatin;AL-11;GV-19;GR-44;ER-37;GE-25;Serpinin-RRG;Serpinin;p-Glu serpinin precursor	hCHGA-F	ATGTTTTGAGACACTCCGAGG
			hCHGA-R	GAGTTCATCTTCAAAACCGCTG
39	STXBP3	Syntaxin-binding protein 3	hSTXBP3-F	CAAGGCAAACCGTTAAGAAAGG
			hSTXBP3-R	TGGACACTGGGAACAATATGG
40	SRP14	Signal recognition particle 14 kDa protein	hSRP14-F	TGACGGAGCTGACCAGACTTT
			hSRP14-R	CTTCTTTGGAATGGGTTTGGTT
41	PPFIA3	Liprin-alpha-3	hPPFIA3-F	GGATGCAGATGGAGATCGAC
			hPPFIA3-R	GTAAAGTGGGTGCCTGAGAG
42	PAM	Peptidyl-glycine alpha-amidating monooxygenase;Peptidylglycine alpha-hydroxylating monooxygenase;Peptidyl-alpha-hydroxyglycine alpha-amidating lyase	hPAM-F	GACGAGTTCAGGAAGAGTACTG
			hPAM-R	TCTTTCTCTTGGTCACTGCC
43	TIMP3	Metalloproteinase inhibitor 3	hTIMP3-F	CCTTCTGCAACTCCGACATC
			hTIMP3-R	GCCTCGGTACATCTTCATCTG
44	MAGED2	Melanoma-associated antigen D2	hMAGED2-F	AGCCAAGAAAGCCCGAAAG
			hMAGED21-R	GAAGCCTGACTCTGATCACTG
45	EXOC3	Exocyst complex component 3	hEXOC3-F	CCATTGCTTTCTCCACACG
			hEXOC3-R	GCTTCTGGCTCTGTCTCTTTG
46	ACAA1	3-ketoacyl-CoA thiolase, peroxisomal	hACAA1-F	CGGTTCTCAAGGACGTGAATC
			hACAA1-R	TGACAGTGGACAAAGGCAC
47	MTMR2	Myotubularin-related protein 2	hMTMR2-F	CAATGCCCAGTCTCACAAAATC
			hMTMR2-R	TCATAACCTCCACCCTTTGC
48	GOLGA1	Golgin subfamily A member 1	hGOLGA1-F	AGACATTCCAAGCCAACAGAG
			hGOLGA1-R	TCATTTCCTGTAACTGGGCTG
49	CST3	Cystatin-C	hCST3-F	AAGACCCAGCCCAACTTG
			hCST3-R	TGACAGGTGGATTTCGACAAG
50	NEU1	Sialidase-1	hNEU1-F	CTGTAGGGTTTGGGTGTTTG
			hNEU1-R	ACTGAGCCGATCTGTCTCC
51	PTPRN	Receptor-type tyrosine-protein phosphatase-like N;Protein-tyrosine-phosphatase	hPTPRN-F	AGGAAGGTGAACAAGTGCTAC
			hPTPRN-R	TCTCCTTCACTCCTTTTGCC
52	WDR7	WD repeat-containing protein 7	hWDR7-F	TGTGGTCGTGAAGATGGAAG
53			hWDR7-R	TGTGACTTTGTTCCGATGACC
	STBD1	Starch-binding domain-containing protein 1	hSTBD1-F	TGAGGATAAAGTGGTTCACGC
54			hSTBD1-R	GCTGAATTTGGAGTCACACTG
	TRAPPC4	Trafficking protein particle complex subunit 4	hTRAPPC4-F	AGACTTTGCCCTCAAGAATCC
55			hTRAPPC4-R	GGGTCCATAACAGGTTCAGC
	UNC13D	Protein unc-13 homolog D	hUNC13D-F	TCTGGGACGAGACCTTCATC
56			hUNC13D-R	TTAAAGATCCTGCGAAGCCC
	RAB27A	Ras-related protein Rab-27A	hRAB27A-F	AGCACTCGCAGAGAAATATGG
			hRAB27A-R	CCTTCAGGAATCCAGGACTTG
internal reference	β-actin	β-actin	hβ-actin-F	AGATGACCCAGATCATGTTTG
			hβ-actin-R	ATCACGATGCCAGTGGTA
